# Supplementary material for: Reaction kinetics of CO2 absorption in to phosphonium based anion-functionalized ionic liquids
Source: Royal Society of Chemistry journal article supplement (doi:10.1039/c3cp51289d), 2013-01-01
Supplement: c3cp51289d.pdf [file c3cp51289d.pdf]

## Reaction Kinetics of CO<sub>2</sub> Absorption of Phosphonium Based Anion-Functionalized Ionic Liquids

Burcu E. Gurkan, Thomas R. Gohndrone, Mark J. McCreedy, Joan F. Brennecke\*

Department of Chemical and Biomolecular Engineering, University of Notre Dame, IN, 46556

### Supplementary Information

#### I. Confirmation of tetraglyme being inert during CO<sub>2</sub> absorption reaction of ILs

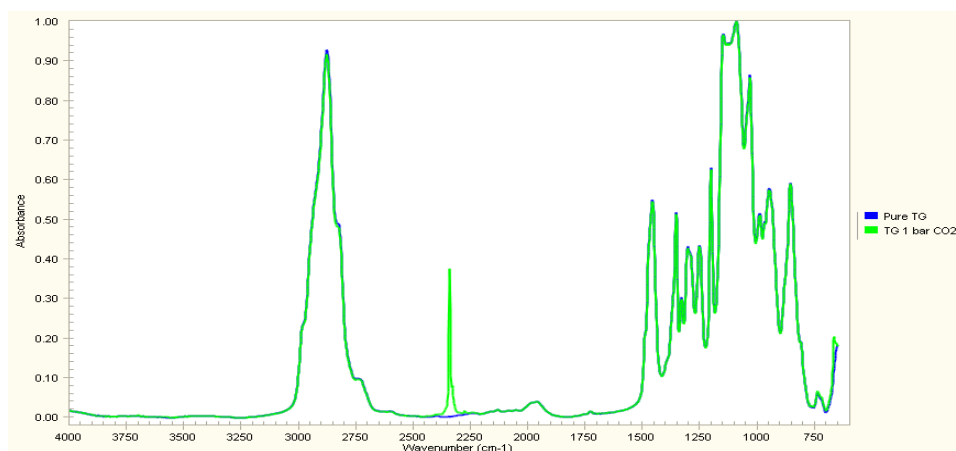

Fig S. 1 IR spectra of neat tetraglyme with (green) and without (blue) CO<sub>2</sub>

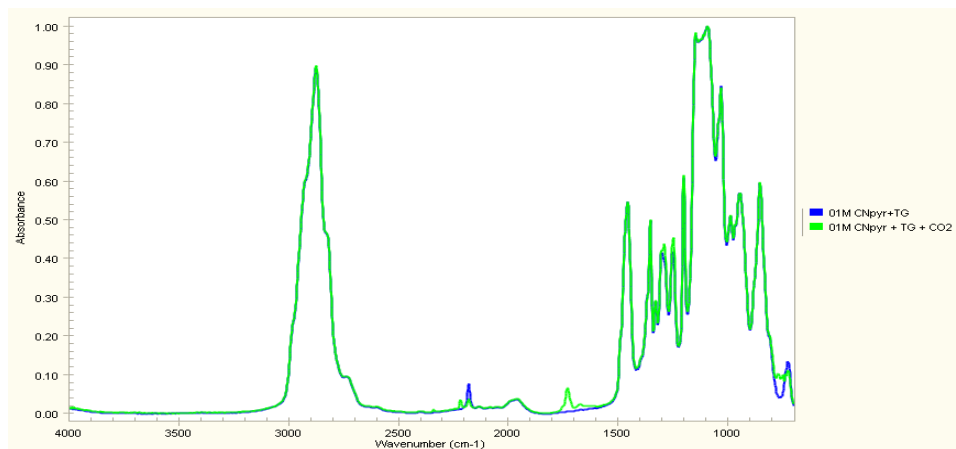

Fig S. 2 IR spectra of neat 0.1 M [P<sub>66614</sub>][2-CNpyr] in tetraglyme with (green) and without (blue) CO<sub>2</sub>

\* jfb@nd.edu

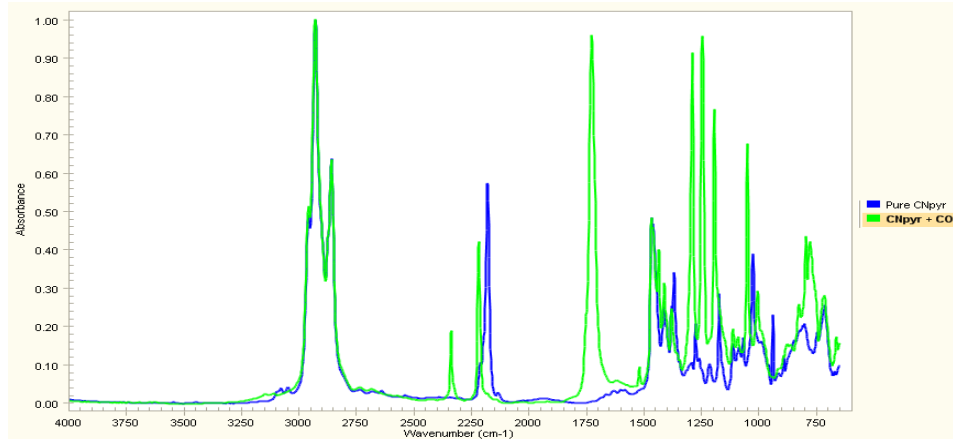

**Fig S. 3** IR spectra of neat [P<sub>66614</sub>][2-CNpyr] with (green) and without (blue) CO<sub>2</sub>

The IR spectrum between 700 and 4000 cm<sup>-1</sup> shown in Fig S.1 is observed for tetraglyme before and after it is exposed to CO<sub>2</sub>. The only additional peak observed upon CO<sub>2</sub> addition is the physically dissolved CO<sub>2</sub> that appears between 2300 and 2400 cm<sup>-1</sup>. In the presence of ionic liquid, (e.g. 0.1 M [P<sub>66614</sub>][2-CNpyr]), two additional peaks appear around 1700 cm<sup>-1</sup> (C=O stretch of reaction product between CO<sub>2</sub> and IL) and the peak around 2200 cm<sup>-1</sup> (CN of the cyanopyrrolide) shifts to higher wavenumbers, as seen in Fig S.2. The physically dissolved CO<sub>2</sub> peak in this case is not observable since these IL/TG+CO<sub>2</sub> reaction measurements were done at very low CO<sub>2</sub> pressures. These changes observed in Fig S.2 are identical to those obtained for the pure IL reacting with CO<sub>2</sub>, as shown in Fig. S.3. Because the solution is very dilute in IL, the characteristic peaks for the IL and CO<sub>2</sub> reaction in Fig. S.2 are observed to be weak in intensity. The additional peaks between 1100 and 1300 cm<sup>-1</sup> from the IL + CO<sub>2</sub> reaction are not observed in Fig S.1 since the neat tetraglyme has very strong peaks that overlap and dominate in this region.

## **II. Reactor design and the details of the experimental methods:**

The schematics shown in Fig S.4 detail the design of the reactor used for both kinetic and gas solubility measurements. The typical CO<sub>2</sub> pressure drop observed in the supply vessel during a kinetic run to maintain a constant pressure in the reactor is shown in Fig S.5.

Physico-chemical properties are either measured or estimated using appropriate approximations. The validation of the method employed in this study for the measurement of gas solubilities is shown in Table S.1. The CO<sub>2</sub> solubility in [hmim][Tf<sub>2</sub>N] is measured and compared with the literature. The raw data measured at 10 and 25 °C are given in Table S.2. For the diffusivity of CO<sub>2</sub>, the correlation (eqn. 16) adapted from the literature is used. The review of literature and the applicability of the correlation are provided in Table S.3 and Fig S.6, respectively.

Materials illustrating the discussions of the in-situ IR observations during the kinetic runs, fit of the activation energies and the details of the calculation of the desorption rates are provided at the end of this section.

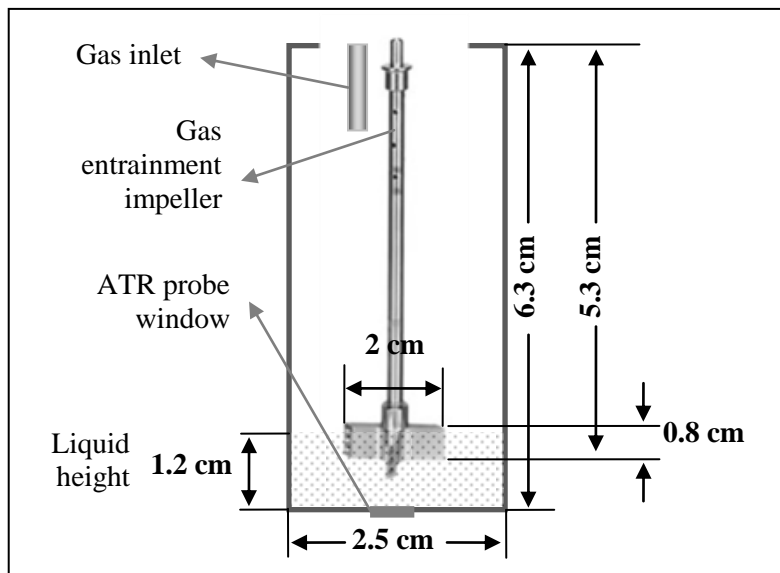

Fig S. 4 Schematics of IR-reactor showing the stirrer location in the liquid

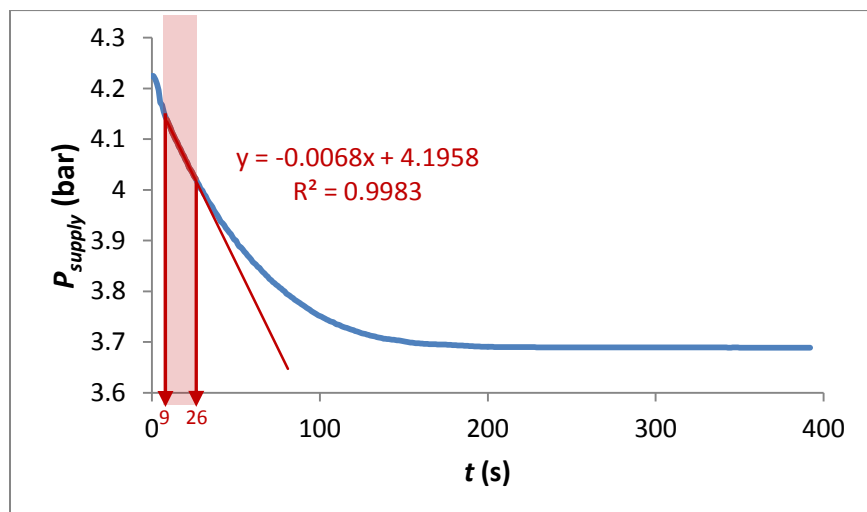

Fig S. 5 Observed pressure drop in the supply vessel during a typical rate experiment. The average flux is calculated from the slope of the linear line fitted to the selected highlighted interval. Data collected for the 0.1M [P<sub>66614</sub>][Pro] / TG system at 22 °C is shown.

**Table S. 1** Comparison of measured and literature Henry's Law constants,  $H$ , for CO<sub>2</sub> in [hmim][Tf<sub>2</sub>N] at 10 and 25 °C

|                                   | 10 °C | 25 °C |
|-----------------------------------|-------|-------|
| $H$ (bar) this study              | 25    | 33    |
| $H$ (bar) literature <sup>1</sup> | 24.2  | 31.6  |
| % difference                      | 3.3   | 4.4   |

**Table S. 2** CO<sub>2</sub> solubility of [hmim][Tf<sub>2</sub>N] at 10 and 25 °C measured in this study

| P (bar) | T (°C) | $x_{CO_2}$ | P (bar) | T (°C) | $x_{CO_2}$ |
|---------|--------|------------|---------|--------|------------|
| 0.850   | 25.2   | 0.0261     | 0.471   | 10     | 0.020      |
| 1.560   | 25.3   | 0.0482     | 0.527   | 10     | 0.022      |
| 2.510   | 25.1   | 0.0767     | 0.801   | 10     | 0.033      |
| 0.186   | 25.3   | 0.0054     | 0.935   | 10     | 0.038      |
| 0.519   | 25.1   | 0.0156     | 1.100   | 10     | 0.045      |
| 1.147   | 25.3   | 0.0346     | 1.220   | 10.1   | 0.050      |
| 1.567   | 25.2   | 0.0472     | 1.459   | 10     | 0.060      |
| 1.986   | 25.1   | 0.0591     | 1.650   | 10.1   | 0.067      |
| --      | --     | --         | 1.734   | 10.1   | 0.071      |
| --      | --     | --         | 1.998   | 10.1   | 0.081      |

**Table S. 3** Comparison of experimental and predicted (using eqn. 15) CO<sub>2</sub> diffusivities for some organics and ILs. The highlighted compounds are the ones that fall beyond the applicable range of the correlation provided in eqn. 15 and the ones that display special interactions such as water and ethylene glycol.

|                                             | T (°C)    | molar volume (L/mol)      | viscosity (cP) | diffusion coefficient $\times 10^6$ (cm <sup>2</sup> /s) | $D_{CO_2}$ predicted | % error    |
|---------------------------------------------|-----------|---------------------------|----------------|----------------------------------------------------------|----------------------|------------|
| <i>water</i> <sup>2</sup>                   | 25        | 0.018                     | 0.8903         | 19.25                                                    | 38.28                | 99         |
| <i>water</i> <sup>3</sup>                   | 20        | 0.018                     | 1.002          | 15.0                                                     | 36.21                | 141        |
| <i>ethylene glycol</i> <sup>4</sup>         | 25        | 0.056                     | 16             | 2.79                                                     | 9.85                 | 253        |
| ethanol <sup>5</sup>                        | 25        | 0.063                     | 1.2            | 34.20                                                    | 33.27                | -3         |
| isobutyl alcohol <sup>5</sup>               | 25        | 0.073                     | 3.36           | 22.00                                                    | 20.50                | -7         |
| toluene <sup>6,7</sup>                      | 25        | 0.118                     | 0.552          | 40.25                                                    | 47.92                | 19         |
| heptane <sup>5</sup>                        | 25        | 0.146                     | 0.411          | 60.30                                                    | 55.04                | -9         |
| hexadecane <sup>6</sup>                     | 50        | 0.301                     | 2.04           | 22.10                                                    | 25.92                | 17         |
| [emim][TfO] <sup>8</sup>                    | 30        | 0.192                     | 45             | 5.20                                                     | 6.06                 | 16         |
| [bmim][BF <sub>4</sub> ] <sup>9</sup>       | 30        | 0.189 <sup>10</sup>       | 75             | 4.10                                                     | 4.76                 | 16         |
| <b>[bmim][BF<sub>4</sub>] <sup>11</sup></b> | <b>30</b> | <b>0.189<sup>10</sup></b> | <b>75</b>      | <b>1.14</b>                                              | <b>4.76</b>          | <b>318</b> |

**Table S.3** Continued

|                                                          | T (° C)   | molar volume<br>(L/mol) | viscosity<br>(cP) | diffusion<br>coefficient<br>$\times 10^6$ (cm <sup>2</sup> /s) | $D_{CO_2}$<br>predicted | % error    |
|----------------------------------------------------------|-----------|-------------------------|-------------------|----------------------------------------------------------------|-------------------------|------------|
| [bmim][PF <sub>6</sub> ] <sup>8</sup>                    | 30        | 0.211                   | 176               | 2.70                                                           | 3.19                    | 18         |
| <b>[bmim][PF<sub>6</sub>]<sup>11</sup></b>               | <b>30</b> | <b>0.211</b>            | <b>176</b>        | <b>0.8</b>                                                     | <b>3.19</b>             | <b>297</b> |
| <i>[desmim][TfO]<sup>8</sup></i>                         | 30        | 0.210                   | 554               | 1.10                                                           | 1.86                    | 69         |
| [emim][Tf <sub>2</sub> N] <sup>8</sup>                   | 30        | 0.258                   | 26                | 6.60                                                           | 7.84                    | 19         |
| [pmmim][Tf <sub>2</sub> N] <sup>9</sup>                  | 30        | 0.288 <sup>12</sup>     | 66.6              | 5.60                                                           | 5.04                    | -10        |
| [N <sub>1114</sub> ][Tf <sub>2</sub> N] <sup>13</sup>    | 30        | 0.290                   | 71                | 4.87                                                           | 4.89                    | 0          |
| [bmim][Tf <sub>2</sub> N] <sup>9</sup>                   | 30        | 0.292 <sup>12</sup>     | 37.4              | 8.50                                                           | 6.61                    | -22        |
| [bmim][BETI] <sup>8</sup>                                | 30        | 0.294                   | 77                | 4.50                                                           | 4.71                    | 5          |
| [bmpy][Tf <sub>2</sub> N] <sup>9</sup>                   | 30        | 0.306                   | 51                | 6.00                                                           | 5.71                    | -5         |
| [N <sub>1134</sub> ][Tf <sub>2</sub> N] <sup>13</sup>    | 30        | 0.315                   | 85                | 4.83                                                           | 4.49                    | -7         |
| [P <sub>2444</sub> ][DEP] <sup>14</sup>                  | 30        | 0.323                   | 207               | 3.50                                                           | 2.96                    | -16        |
| [N <sub>1116</sub> ][Tf <sub>2</sub> N] <sup>13</sup>    | 30        | 0.325                   | 100               | 4.38                                                           | 4.16                    | -5         |
| [N <sub>1136</sub> ][Tf <sub>2</sub> N] <sup>13</sup>    | 30        | 0.353                   | 126               | 3.72                                                           | 3.73                    | 0          |
| [N <sub>2226</sub> ][Tf <sub>2</sub> N] <sup>13</sup>    | 30        | 0.366                   | 167               | 4.68                                                           | 3.27                    | -30        |
| <i>[N<sub>4441</sub>][Tf<sub>2</sub>N]<sup>13</sup></i>  | 30        | 0.384                   | 386               | 3.41                                                           | 2.21                    | -35        |
| [N <sub>11110</sub> ][Tf <sub>2</sub> N] <sup>13</sup>   | 30        | 0.393                   | 173               | 4.60                                                           | 3.22                    | -30        |
| [N <sub>11310</sub> ][Tf <sub>2</sub> N] <sup>13</sup>   | 30        | 0.425                   | 183               | 3.78                                                           | 3.13                    | -17        |
| [P <sub>66614</sub> ][DCA] <sup>14</sup>                 | 30        | 0.578                   | 213               | 3.00                                                           | 2.92                    | -3         |
| <i>[thtdp][Cl]<sup>8</sup></i>                           | 30        | 0.590                   | 919               | 2.20                                                           | 1.47                    | -33        |
| <i>[P<sub>66614</sub>][Cl]<sup>14</sup></i>              | 30        | 0.590                   | 1316              | 3.00                                                           | 1.24                    | -59        |
| <i>[N<sub>1888</sub>][Tf<sub>2</sub>N]<sup>13</sup></i>  | 30        | 0.601                   | 532               | 3.43                                                           | 1.90                    | -45        |
| <i>[emim][EtSO<sub>4</sub>]<sup>15</sup></i>             | 30        | 0.641                   | 76                | 2.19                                                           | 4.73                    | 116        |
| <i>[P<sub>66614</sub>][DBS]<sup>14</sup></i>             | 30        | 0.731                   | 3011              | 1.70                                                           | 0.84                    | -51        |
| <i>[P<sub>66614</sub>][Tf<sub>2</sub>N]<sup>14</sup></i> | 30        | 0.804                   | 243               | 6.20                                                           | 2.74                    | -56        |

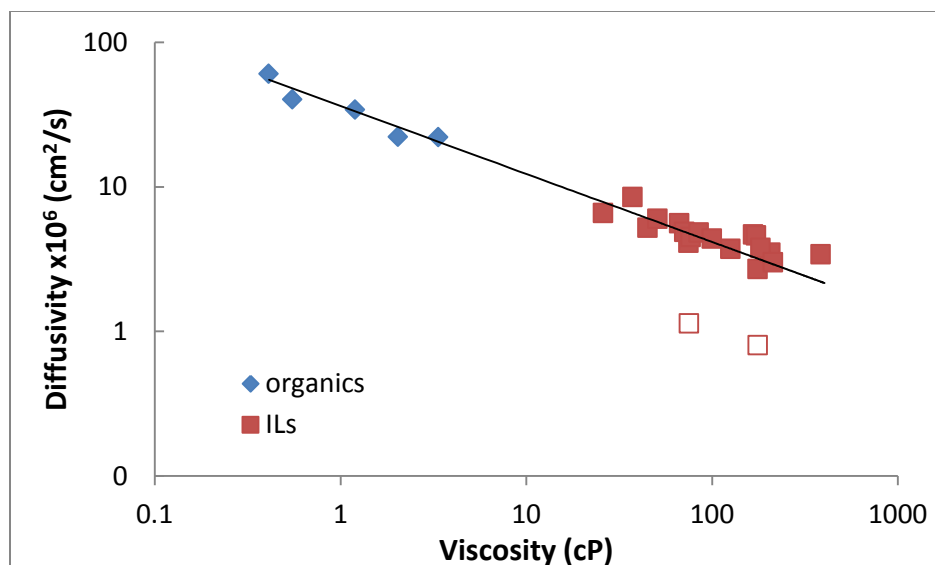

**Fig S. 6** Correlation between diffusivity of CO<sub>2</sub> and the viscosity of organics. The correlation is extrapolated to higher viscosities and the experimental CO<sub>2</sub> diffusivities measured for ILs fall on this line with a maximum of 35 % error, including [N<sub>4441</sub>][Tf<sub>2</sub>N]. The diffusivities obtained by Shiflett and Yokozeki <sup>11</sup> are represented with open symbols. ILs with molar volumes above 0.59 L/mol and viscosities above 386 cP are excluded.

**Table S. 4** First order reaction rate constants measured for [P<sub>66614</sub>][Pro] / TG solutions

| <i>C</i> <sub>IL</sub> (mol / L) | run # | <i>P</i> <sub>CO<sub>2</sub></sub> (mbar) | <i>T</i> (°C) | <i>k</i> (1/s) | <i>k</i> <sub>average</sub> (1/s) |
|----------------------------------|-------|-------------------------------------------|---------------|----------------|-----------------------------------|
| 0.05                             | 1     | 10.6                                      | 21.2          | 1100           | 1000                              |
|                                  | 2     | 14.2                                      | 21.4          | 990            |                                   |
|                                  | 3     | 14.1                                      | 21.8          | 980            |                                   |
| 0.1                              | 1     | 15.1                                      | 22.6          | 1800           | 1900                              |
|                                  | 2     | 14.8                                      | 21.7          | 2200           |                                   |
|                                  | 3     | 15.6                                      | 22.2          | 1800           |                                   |
| 0.15                             | 1     | 14.9                                      | 22.2          | 4000           | 4200                              |
|                                  | 2     | 15.0                                      | 22.1          | 4300           |                                   |
|                                  | 3     | 14.7                                      | 22.2          | 4500           |                                   |
| 0.1                              | 1     | 16.4                                      | 29.9          | 4300           | 4400                              |
|                                  | 2     | 16.4                                      | 30.0          | 4300           |                                   |
|                                  | 3     | 16.2                                      | 29.8          | 4500           |                                   |
| 0.1                              | 1     | 16.9                                      | 39.8          | 5900           | 6200                              |
|                                  | 2     | 16.2                                      | 39.5          | 6200           |                                   |
|                                  | 3     | 16.1                                      | 39.6          | 6500           |                                   |
| 0.1                              | 1     | 17.1                                      | 49.8          | 8000           | 8600                              |
|                                  | 2     | 17.0                                      | 49.4          | 8600           |                                   |
|                                  | 3     | 16.7                                      | 49.6          | 9100           |                                   |
| 0.1                              | 1     | 15.9                                      | 60.0          | 11100          | 11000                             |
|                                  | 2     | 18.2                                      | 60.0          | 9600           |                                   |
|                                  | 3     | 17.3                                      | 60.8          | 12100          |                                   |

**Table S. 5** First order reaction rate constants measured for [P<sub>66614</sub>][2-CNpyr] / TG solutions

| $C_{IL}$ (mol / L) | run # | $P_{CO_2}$ (mbar) | $T$ ( °C) | $k$ (1/s) | $k_{average}$ (1/s) |
|--------------------|-------|-------------------|-----------|-----------|---------------------|
| 0.05               | 1     | 15.4              | 21.8      | 390       | 370                 |
|                    | 2     | 15.1              | 21.9      | 370       |                     |
|                    | 3     | 15.0              | 23.0      | 340       |                     |
| 0.1                | 1     | 16.2              | 22.5      | 790       | 850                 |
|                    | 2     | 14.9              | 21.1      | 880       |                     |
|                    | 3     | 14.8              | 22.1      | 870       |                     |
| 0.15               | 1     | 15.2              | 21.6      | 1600      | 1500                |
|                    | 2     | 15.2              | 21.9      | 1500      |                     |
|                    | 3     | 14.6              | 21.1      | 1300      |                     |
| 0.1                | 1     | 16.0              | 30.0      | 910       | 910                 |
|                    | 2     | 16.0              | 29.9      | 940       |                     |
|                    | 3     | 16.5              | 29.9      | 890       |                     |
| 0.1                | 1     | 11.6              | 39.8      | 1000      | 1100                |
|                    | 2     | 15.4              | 39.8      | 1100      |                     |
|                    | 3     | 16.6              | 39.8      | 1100      |                     |
| 0.1                | 1     | 14.7              | 49.5      | 1200      | 1200                |
|                    | 2     | 15.6              | 49.1      | 1300      |                     |
|                    | 3     | 16.1              | 49.7      | 1200      |                     |
| 0.1                | 1     | 14.2              | 59.5      | 1300      | 1600                |
|                    | 2     | 16.9              | 59.7      | 1700      |                     |
|                    | 3     | 16.1              | 59.5      | 1400      |                     |

**Table S. 6** First order reaction rate constants measured for [P<sub>66614</sub>][3-CF<sub>3</sub>pyra] / TG solutions

| $C_{IL}$ (mol / L) | run # | $P_{CO_2}$ (mbar) | $T$ ( °C) | $k$ (1/s) | $k_{average}$ (1/s) |
|--------------------|-------|-------------------|-----------|-----------|---------------------|
| 0.05               | 1     | 15.4              | 22.6      | 160       | 150                 |
|                    | 2     | 15.4              | 22.0      | 140       |                     |
|                    | 3     | 15.4              | 23.2      | 140       |                     |
| 0.1                | 1     | 15.5              | 22.0      | 320       | 320                 |
|                    | 2     | 15.7              | 22.6      | 300       |                     |
|                    | 3     | 15.1              | 22.7      | 330       |                     |
| 0.15               | 1     | 15.0              | 22.3      | 530       | 500                 |
|                    | 2     | 15.2              | 21.3      | 490       |                     |
|                    | 3     | 15.4              | 23.2      | 490       |                     |
| 0.1                | 1     | 16.4              | 29.9      | 320       | 340                 |
|                    | 2     | 16.7              | 29.9      | 340       |                     |
|                    | 3     | 15.3              | 29.9      | 350       |                     |
| 0.1                | 1     | 14.3              | 39.7      | 510       | 490                 |
|                    | 2     | 16.9              | 39.9      | 490       |                     |
|                    | 3     | 17.1              | 39.9      | 470       |                     |
| 0.1                | 1     | 17.5              | 49.3      | 560       | 530                 |
|                    | 2     | 16.9              | 50.0      | 500       |                     |
|                    | 3     | 16.3              | 49.0      | 520       |                     |
|                    | 4     | 16.4              | 48.4      | 550       |                     |
| 0.1                | 1     | 15.1              | 58.8      | 740       | 740                 |

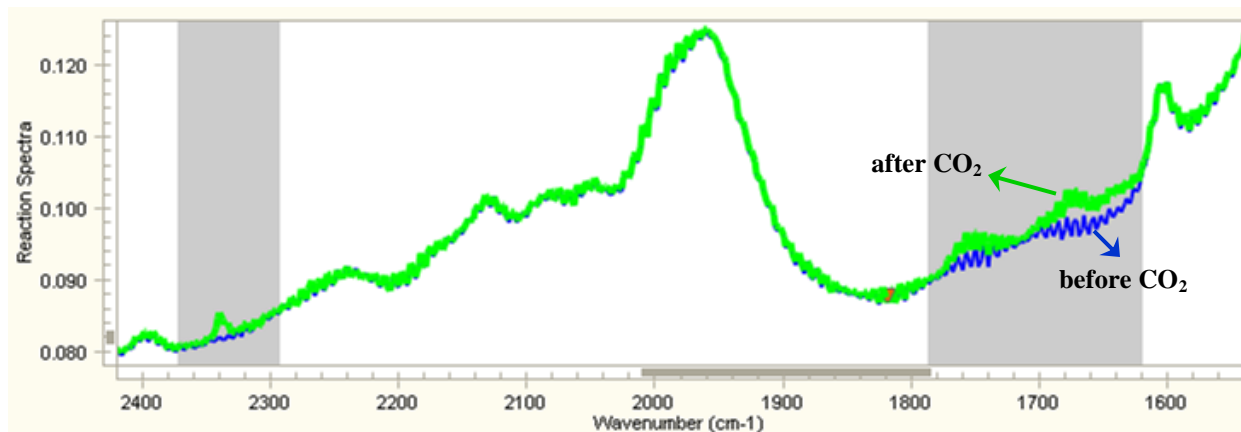

**Fig S. 7** IR spectra of 0.1M [P<sub>66614</sub>][3-CF<sub>3</sub>pyra] / TG at 60 °C before and after reaction with CO<sub>2</sub>. Highlighted regions (2370 – 2310) cm<sup>-1</sup> and (1780 – 1620) cm<sup>-1</sup> correspond to the dissolved CO<sub>2</sub> and the newly formed -COO<sup>-</sup> peaks, respectively.

The in-situ IR observations during kinetic measurements helped determine the conditions where the pseudo first order approximation was valid and select the time interval for kinetic analysis. Fig S.7 illustrates the observed absorbance between 2400 and 1500 cm<sup>-1</sup> for 0.1 M [P<sub>66614</sub>][3-CF<sub>3</sub>pyra] at 60 °C. Due to the low CO<sub>2</sub> capacity of this IL, the changes in the IR spectrum are small. In other words, this is a ‘worst-case scenario’. In order to clearly see the changes, the selected interval is expanded in Fig S.7, which causes the spectra to appear noisy. The CO<sub>2</sub> and newly formed -COO<sup>-</sup> peaks are highlighted in the figure.

**Table S. 7** Arrhenius parameters fitted to the kinetic data shown in Figure 5. R<sup>2</sup> indicates the goodness of the fit

| $k = A \cdot \exp\left(\frac{-E_a}{RT}\right)$ | $E_a$ (kJ/mol) | $A$                    | $R^2$  |
|------------------------------------------------|----------------|------------------------|--------|
| [P <sub>66614</sub> ][Pro]                     | 43 ± 7         | 8.02 x 10 <sup>8</sup> | 0.9475 |
| [P <sub>66614</sub> ][2-CNpyr]                 | 11 ± 6         | 0.73 x 10 <sup>3</sup> | 0.8876 |
| [P <sub>66614</sub> ][3-CF <sub>3</sub> pyra]  | 18 ± 4         | 4.65 x 10 <sup>3</sup> | 0.9523 |

On the desorption rates:

CO<sub>2</sub> absorption  $r_{abs}$  and desorption  $r_{des}$  rate expressions can be written as

$$r_{abs} = k_2 C_{IL} C_{CO_2} \quad (S.1)$$

$$r_{des} = k_{-1} C_{IL-CO_2} \quad (S.2)$$

and

$$\frac{r_{des}}{r_{abs}} = \frac{k_{-1} C_{IL-CO_2}}{k_2 C_{IL} C_{CO_2}} = \frac{k_{-1} n_{IL-CO_2}}{k_2 n_{IL} n_{CO_2}} V_{sample} \quad (S.3)$$



where the moles of species  $i$  can be written in terms of their mole fraction:  $n_i = x_i n_{total}$ . Furthermore, the amount of CO<sub>2</sub> that is available to react with the IL can be written in terms of the Henry's Law constant ( $P_{CO_2} = H x_{CO_2}$ ).

$$\frac{r_{des}}{r_{abs}} = \frac{k_{-1} x_{IL-CO_2} V_{sample}}{k_2 x_{IL} P_{CO_2} n_{total}} H \quad (S.4)$$

When we write the overall reaction between CO<sub>2</sub> and IL to form IL-CO<sub>2</sub>

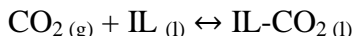

with forward and reverse rate constants as  $k_2$  and  $k_{-1}$ , respectively, we can write the equilibrium constant for this reaction as

$$K = \left( \frac{\hat{f}_{CO_2}}{f_{CO_2}^0} \right)^{-1} \left( \frac{\hat{f}_{IL}}{f_{IL}^0} \right)^{-1} \left( \frac{\hat{f}_{IL-CO_2}}{f_{IL-CO_2}^0} \right)^1 \quad (S.5)$$

Assuming the standard state as 1 bar ( $f_{CO_2}^0 = 1$ ) and the fugacity of the pure liquid at the same temperature as the system ( $f_{IL}^0$  and  $f_{IL-CO_2}^0$ ) to be the vapor pressures of those pure components, eqn. (S.5) can be simplified as

$$K = \frac{(x_{IL-CO_2} \gamma_{IL-CO_2})}{(y_{CO_2} P_{CO_2})(x_{IL} \gamma_{IL})} \quad (S.6)$$

where  $\gamma_i$  is the activity coefficient and  $x_i$  is the mole fraction. Because the IL or the IL/tetraglyme mixture is essentially nonvolatile, the only specie present in the gas phase is CO<sub>2</sub>. Therefore, the mole fraction of CO<sub>2</sub> in the gas phase is 1 ( $y_{CO_2}=1$ ). When we further assume that the activity coefficients of the IL and that of the product are similar, eqn. (S.6) can be simplified to:

$$K = \frac{(x_{IL-CO_2})}{(P_{CO_2})(x_{IL})} \quad (S.7)$$

Returning to eqn. (S.4), the left hand side includes the familiar expression of the equilibrium constant derived in eqn. (S.7). At chemical equilibrium absorption and desorption rates are equal. Therefore,

$$1 = \frac{k_{-1}}{k_2} K \frac{V_{sample}}{n_{total}} H \quad (S.8)$$

Rearranging eqn. (S.8) in terms of the desorption rate constant ( $s^{-1}$ ) yields:

$$k_{-1} = \frac{k_2}{K} \frac{1}{H} \frac{n_{total}}{V_{sample}} \quad (S.9)$$

The temperature dependence of the equilibrium constant is shown in Fig S.8 (data for [P<sub>66614</sub>][2-CNpyr] and [P<sub>66614</sub>][3-CF<sub>3</sub>pyra] are given in Table 4 and those for [P<sub>66614</sub>][Pro] can be found in Goodrich, 2011<sup>16</sup>). The slope of  $\ln K$  vs  $1/T$  yields the reaction enthalpy in the form of  $(-\Delta H/R)$  where  $R$  is the gas constant. The intercept corresponds to the change of entropy in the form of  $(\Delta S/R)$ . Accordingly, the reaction enthalpies of CO<sub>2</sub> absorption by [P<sub>66614</sub>][Pro] and [P<sub>66614</sub>][2-CNpyr] are -44 and -43 kJ / mol, respectively. Comparing the CO<sub>2</sub> isotherms for [P<sub>66614</sub>][Pro] in<sup>17</sup> with that of [P<sub>66614</sub>][2-CNpyr] in<sup>18</sup>, it is clear that the reaction enthalpies for both ILs should be quite different. [P<sub>66614</sub>][Pro] has a higher affinity towards CO<sub>2</sub>. Therefore, one would expect the reaction enthalpy for this IL to be more exothermic. The only explanation for this unexpected

enthalpy is that the assumed Langmuir-type model is not suitable to describe the CO<sub>2</sub> reaction with [P<sub>66614</sub>][Pro].

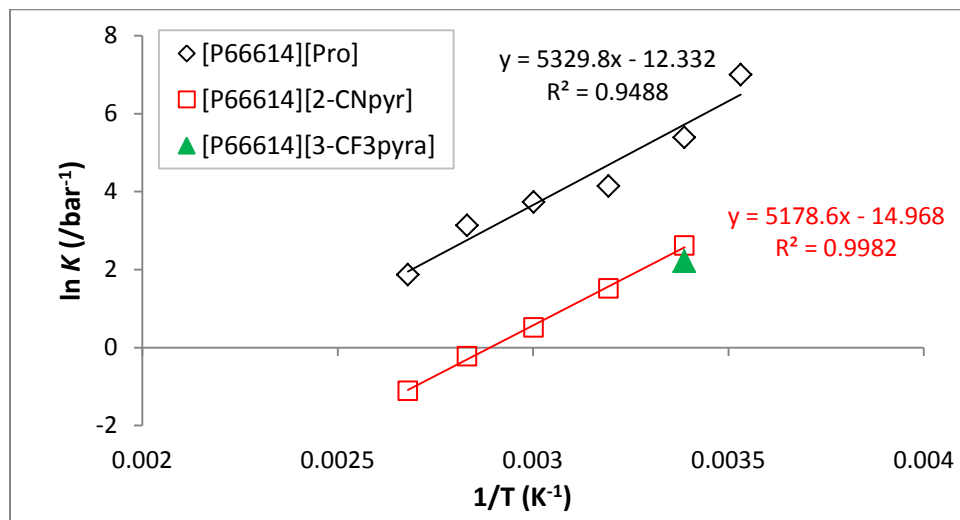

**Fig S. 8** Dependence of the equilibrium constants for reaction of CO<sub>2</sub> with [P<sub>66614</sub>][Pro] and [P<sub>66614</sub>][2-CNpyr] on temperature.

To calculate the equilibrium constants at 80 and 100 °C, where data is not available, the relations obtained in Fig S.8 were used. It was assumed that temperature dependence of  $\Delta H$  is negligible. For [P<sub>66614</sub>][3-CF<sub>3</sub>pyra], the same change of entropy for [P<sub>66614</sub>][2-CNpyr] ( $\Delta S = -130$  kJ / mol) was adapted to calculate the reaction enthalpy.

### III. Other raw data for the measured properties:

**Table S. 5** Experimental densities for the neat tetraglyme (TG) and IL/TG solutions. Kodama et al. <sup>19</sup>. reported an uncertainty of  $\pm 0.0001 \text{ g}\cdot\text{cm}^{-3}$  for their density measurement of TG; however, they did not report the water content of their sample. The discrepancy between our measurements and those reported by Kodama et al. can be explained by the difference in water content.

| $C_{IL}$<br>(mol/L)                              | water<br>content<br>(ppm) | density ( $\text{g}\cdot\text{cm}^{-3}$ ) |         |         |         |         |         |         |         |
|--------------------------------------------------|---------------------------|-------------------------------------------|---------|---------|---------|---------|---------|---------|---------|
|                                                  |                           | 22°C                                      | 25°C    | 30°C    | 35°C    | 40°C    | 45°C    | 50°C    | 60°C    |
| <b>[P<sub>66614</sub>][Pro]</b>                  |                           |                                           |         |         |         |         |         |         |         |
| 0.05                                             | 400                       | 1.00568                                   | 1.00295 | 0.99841 | 0.99387 | 0.98936 | 0.9848  | 0.98029 | 0.97123 |
| 0.10                                             | 473                       | 1.00289                                   | 1.00021 | 0.99571 | 0.99125 | 0.98675 | 0.98227 | 0.97782 | 0.96882 |
| 0.15                                             | 550                       | 0.99989                                   | 0.99724 | 0.99281 | 0.98838 | 0.98398 | 0.97956 | 0.97514 | 0.9663  |
| <b>[P<sub>66614</sub>][2-CNpyr]</b>              |                           |                                           |         |         |         |         |         |         |         |
| 0.05                                             | 470                       | 1.00575                                   | 1.00304 | 0.9985  | 0.99398 | 0.98944 | 0.98488 | 0.98037 | 0.97132 |
| 0.10                                             | 477                       | 1.00213                                   | 0.99945 | 0.99497 | 0.99049 | 0.98602 | 0.98162 | 0.9771  | 0.9682  |
| 0.15                                             | 490                       | 0.99858                                   | 0.99596 | 0.99153 | 0.98712 | 0.98273 | 0.97831 | 0.97393 | 0.96514 |
| <b>[P<sub>66614</sub>][3-CF<sub>3</sub>pyra]</b> |                           |                                           |         |         |         |         |         |         |         |
| 0.05                                             | 358                       | 1.0071                                    | 1.00438 | 0.99984 | 0.99529 | 0.99073 | 0.98616 | 0.98163 | 0.97254 |
| 0.10                                             | 378                       | 1.00501                                   | 1.00231 | 0.9978  | 0.9933  | 0.98882 | 0.98433 | 0.97983 | 0.9708  |
| 0.15                                             | 400                       | 1.00298                                   | 1.00033 | 0.99587 | 0.99144 | 0.98698 | 0.98255 | 0.9781  | 0.96922 |
| <b>tetraglyme</b>                                |                           |                                           |         |         |         |         |         |         |         |
| this work                                        | 224                       | 1.00890                                   | 1.00618 | 1.00160 | 0.99700 | 0.99245 | 0.98786 | 0.98327 | 0.97409 |
| <sup>19</sup> Kodama et al., 2011                |                           |                                           | 1.00743 | 1.00281 |         | 0.99356 |         | 0.98432 | 0.97507 |

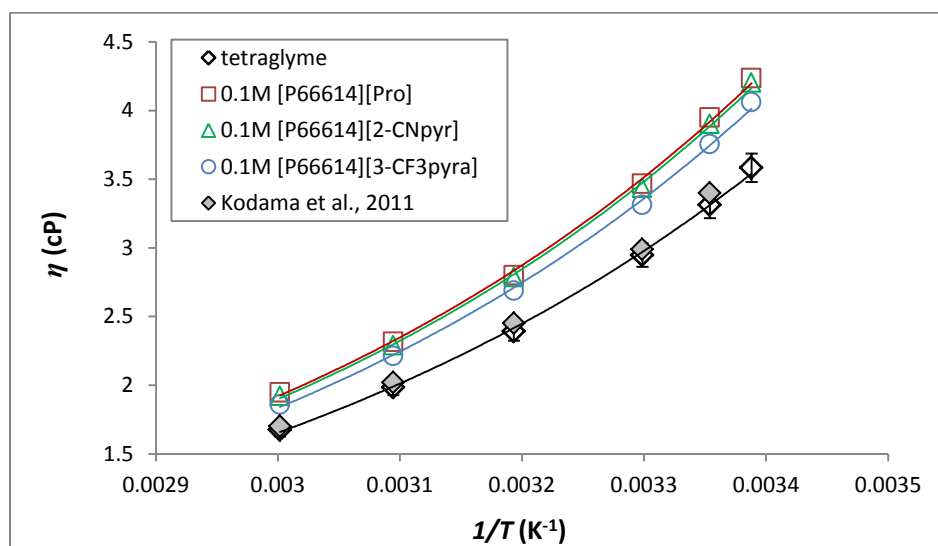

**Fig S. 9** Arrhenius behavior of viscosities of tetraglyme and 0.1M IL / TG solutions. The lines represent fitted exponential trends.

**Table S. 4** Data measured for the CO<sub>2</sub> solubility in tetraglyme.

| P (bar) | T (°C) | x <sub>CO2</sub> | P (bar)      | T (°C)      | x <sub>CO2</sub> |
|---------|--------|------------------|--------------|-------------|------------------|
| 0.381   | 22.1   | 0.0132           | <i>0.149</i> | <i>23.5</i> | <i>0.005</i>     |
| 0.649   | 22.3   | 0.0225           | 0.272        | 24          | 0.0091           |
| 0.877   | 22.1   | 0.0308           | 0.385        | 24.2        | 0.0129           |
| 1.1     | 22.1   | 0.0388           | 0.69         | 24.4        | 0.0246           |
| 1.379   | 22.2   | 0.0483           | 0.976        | 24.2        | 0.0331           |
| 1.671   | 22.2   | 0.0581           | 1.76         | 24.2        | 0.0588           |
| 2.007   | 22.2   | 0.071            | 2.2          | 24.3        | 0.0725           |
| 2.277   | 22.2   | 0.08             | 2.941        | 24.6        | 0.0942           |
| 2.579   | 22.3   | 0.0905           | 3.906        | 24.8        | 0.1223           |
| 2.905   | 22.3   | 0.101            | 4.784        | 25.3        | 0.1521           |
| 0.382   | 21.9   | 0.0132           | 0.465        | 25          | 0.0153           |
| 0.838   | 22.1   | 0.0288           | 0.747        | 25.1        | 0.0249           |
| 1.167   | 22.2   | 0.0399           | 1.036        | 25          | 0.0349           |
| 1.493   | 22.3   | 0.0509           | 1.587        | 24.9        | 0.0538           |
| 1.854   | 22.2   | 0.0632           | --           | --          | --               |
| 2.157   | 22.3   | 0.0733           | --           | --          | --               |
| 2.926   | 22.3   | 0.0973           | --           | --          | --               |
| 0.395   | 30.3   | 0.011            | <i>0.162</i> | <i>38.9</i> | <i>0.0039</i>    |
| 0.602   | 30.3   | 0.0166           | 0.285        | 39.1        | 0.007            |
| 0.801   | 30.3   | 0.0221           | 0.397        | 39.1        | 0.0099           |
| 1.014   | 30.4   | 0.0279           | 0.51         | 39          | 0.0127           |
| 1.195   | 30.5   | 0.0328           | 0.938        | 39          | 0.0234           |
| 1.361   | 30.7   | 0.0373           | 1.857        | 39          | 0.0451           |
| 1.558   | 30.4   | 0.043            | 2.87         | 38.9        | 0.0719           |
| 1.776   | 30.4   | 0.0489           | 4.64         | 38.8        | 0.1137           |
| 2.072   | 30.4   | 0.0567           | 0.463        | 39.2        | 0.01             |
| 2.811   | 30.4   | 0.0756           | 0.488        | 39.4        | 0.0102           |
| --      | --     | --               | 1.021        | 39.4        | 0.0224           |
| --      | --     | --               | 1.401        | 39.6        | 0.0314           |
| --      | --     | --               | 2.063        | 39.5        | 0.0466           |
| --      | --     | --               | 3.173        | 39.5        | 0.0717           |
| 0.349   | 49.8   | 0.0064           | 0.255        | 59.5        | 0.0043           |
| 0.596   | 49.6   | 0.0114           | 0.392        | 59.6        | 0.0067           |
| 0.822   | 49.5   | 0.0157           | 0.504        | 59.6        | 0.0089           |
| 1.033   | 49.5   | 0.0201           | 0.617        | 59.3        | 0.0108           |
| 1.248   | 49.5   | 0.0251           | 0.727        | 59.3        | 0.0127           |
| 1.55    | 49.6   | 0.0316           | 0.836        | 59.2        | 0.0145           |
| 1.875   | 49.7   | 0.0382           | 1.031        | 59.1        | 0.0178           |
| 2.196   | 49.6   | 0.045            | 1.244        | 59          | 0.0214           |
| 2.617   | 49.7   | 0.0533           | 1.543        | 59.1        | 0.027            |
| 0.349   | 50.6   | 0.0063           | 2.108        | 59.1        | 0.0369           |
| 0.59    | 50.3   | 0.0109           | 3.161        | 59          | 0.0552           |
| 0.814   | 49.8   | 0.0154           | 0.604        | 59.1        | 0.0099           |
| 1.031   | 49.9   | 0.0201           | 0.962        | 58.9        | 0.0163           |
| 1.24    | 50     | 0.0253           | 1.158        | 58.9        | 0.0199           |
| 1.79    | 50     | 0.0372           | 1.726        | 59.1        | 0.0296           |
| 2.249   | 50     | 0.0474           | 2.325        | 59          | 0.0398           |
| 2.678   | 49.9   | 0.0582           | 3.09         | 59.1        | 0.0529           |

**Table S. 5** N<sub>2</sub>O solubility in tetraglyme measured in this study.

| P (bar) | T (°C) | x <sub>N<sub>2</sub>O</sub> | P (bar) | T (°C) | x <sub>N<sub>2</sub>O</sub> |
|---------|--------|-----------------------------|---------|--------|-----------------------------|
| 0.507   | 22.4   | 0.0112                      | 0.432   | 39.5   | 0.0079                      |
| 0.859   | 22.5   | 0.0204                      | 0.606   | 39.4   | 0.0113                      |
| 1.108   | 22.3   | 0.0273                      | 0.812   | 39.4   | 0.0156                      |
| 1.335   | 22.2   | 0.0335                      | 1.027   | 39.4   | 0.02                        |
| 1.556   | 22.3   | 0.0394                      | 1.249   | 39.5   | 0.0252                      |
| 1.814   | 22.2   | 0.0464                      | 1.539   | 39.4   | 0.0318                      |
| 2.064   | 22.2   | 0.054                       | 1.862   | 39.4   | 0.0387                      |
| 2.303   | 22.2   | 0.0608                      | 3.384   | 39.3   | 0.0683                      |
| 2.537   | 22.2   | 0.0669                      | 0.436   | 39.8   | 0.0086                      |
| 3.143   | 22.2   | 0.0826                      | 0.871   | 39.7   | 0.0174                      |
| 3.709   | 22.2   | 0.098                       | 1.174   | 39.7   | 0.0242                      |
| 4.04    | 22.3   | 0.1073                      | 1.58    | 39.7   | 0.0336                      |
| 0.48    | 22.1   | 0.0128                      | 1.964   | 39.7   | 0.0429                      |
| 0.854   | 22.2   | 0.0227                      | 2.211   | 39.7   | 0.0505                      |
| 1.23    | 22.4   | 0.0329                      | 2.783   | 39.7   | 0.0648                      |
| 1.607   | 22.2   | 0.0433                      | 0.625   | 59     | 0.009                       |
| 2.109   | 22.3   | 0.0565                      | 1.004   | 58.9   | 0.0146                      |
| 2.479   | 22.4   | 0.0666                      | 1.243   | 59.1   | 0.019                       |
| 3.248   | 22.4   | 0.087                       | 1.649   | 59.1   | 0.0256                      |
| 0.203   | 24.8   | 0.0052                      | 2.054   | 59.1   | 0.0338                      |
| 0.828   | 24.9   | 0.021                       | 2.329   | 59     | 0.0388                      |
| 1.148   | 25.1   | 0.0295                      | 3.013   | 59     | 0.0493                      |
| 1.599   | 25     | 0.0409                      | 0.462   | 59.4   | 0.0066                      |
| 2.066   | 25.15  | 0.0525                      | 0.532   | 59.5   | 0.0075                      |
| 2.841   | 25.23  | 0.0712                      | 0.811   | 59.4   | 0.0117                      |
| --      | --     | --                          | 1.04    | 58.9   | 0.0151                      |
| --      | --     | --                          | 1.17    | 59.3   | 0.0173                      |
| --      | --     | --                          | 1.372   | 59.3   | 0.0206                      |
| --      | --     | --                          | 1.588   | 59.3   | 0.0239                      |
| --      | --     | --                          | 1.71    | 58.9   | 0.0298                      |
| --      | --     | --                          | 2.092   | 59     | 0.035                       |
| --      | --     | --                          | 2.434   | 58.9   | 0.0399                      |
| --      | --     | --                          | 3.12    | 58.8   | 0.0495                      |

**Table S. 6** Data measured for N<sub>2</sub>O solubility in [hmim][Tf<sub>2</sub>N] and [hmpy][Tf<sub>2</sub>N]

| [hmim][Tf <sub>2</sub> N] |        |                  | [hmpy][Tf <sub>2</sub> N] |        |                  |
|---------------------------|--------|------------------|---------------------------|--------|------------------|
| P (bar)                   | T (°C) | x <sub>N2O</sub> | P (bar)                   | T (°C) | x <sub>N2O</sub> |
| 0.187                     | 24.8   | 0.006            | 0.154                     | 24.9   | 0.005            |
| 0.429                     | 24.8   | 0.014            | 0.34                      | 25     | 0.012            |
| 0.803                     | 24.9   | 0.031            | 0.591                     | 24.9   | 0.02             |
| 1.035                     | 24.9   | 0.038            | 0.838                     | 25     | 0.029            |
| 1.277                     | 25     | 0.046            | 1.045                     | 25     | 0.037            |
| 1.367                     | 25     | 0.049            | 1.437                     | 24.9   | 0.052            |
| 0.146                     | 25     | 0.004            | 1.792                     | 24.9   | 0.064            |
| 0.272                     | 25     | 0.008            | 0.113                     | 49.7   | 0.002            |
| 0.5                       | 25     | 0.016            | 0.272                     | 49.7   | 0.006            |
| 0.831                     | 25.1   | 0.027            | 0.4                       | 50.1   | 0.008            |
| 1.244                     | 25     | 0.041            | 0.523                     | 50.1   | 0.011            |
| 1.854                     | 25     | 0.061            | 0.876                     | 50     | 0.019            |
| 1.289                     | 25.1   | 0.044            | 1.243                     | 50     | 0.028            |
| 0.105                     | 50     | 0.002            | 1.612                     | 50     | 0.036            |
| 0.332                     | 50.1   | 0.006            | 1.866                     | 50.1   | 0.043            |
| 0.642                     | 50.1   | 0.013            |                           |        |                  |
| 1                         | 50.1   | 0.021            |                           |        |                  |
| 1.201                     | 50.1   | 0.026            |                           |        |                  |
| 1.421                     | 50.2   | 0.031            |                           |        |                  |
| 1.93                      | 50.2   | 0.043            |                           |        |                  |

**Table S. 7** Data measured for N<sub>2</sub>O solubility in [P<sub>66614</sub>][Pro]

| P (bar) | T (°C) | x <sub>N2O</sub> | P (bar) | T (°C) | x <sub>N2O</sub> |
|---------|--------|------------------|---------|--------|------------------|
| 0.097   | 24.7   | 0.004            | 0.145   | 25.2   | 0.006            |
| 0.287   | 24.8   | 0.013            | 0.338   | 25.1   | 0.015            |
| 0.499   | 24.8   | 0.023            | 0.588   | 25.1   | 0.026            |
| 0.61    | 24.8   | 0.032            | 0.869   | 25     | 0.040            |
| 0.804   | 24.8   | 0.040            | 1.086   | 25     | 0.047            |
| 0.935   | 24.9   | 0.046            | --      | --     | --               |
| 1.106   | 24.9   | 0.055            | --      | --     | --               |
| 1.236   | 24.9   | 0.061            | --      | --     | --               |

## REFERENCES

1. J. L. Anderson, J. K. Dixon, E. J. Maginn and J. F. Brennecke, *Journal of Physical Chemistry B*, 2006, **110**, 15059-15062.
2. G. F. Versteeg and W. P. M. Vanswaaij, *Journal of Chemical and Engineering Data*, 1988, **33**, 29-34.
3. J. H. Arnold, *Journal of the American Chemical Society*, 1930, **52**, 3937-3955.
4. W. Hayduk and V. K. Malik, *Journal of Chemical and Engineering Data*, 1971, **16**, 143-&.
5. G. A. Davies, A. B. Ponter and K. Craine, *Canadian Journal of Chemical Engineering*, 1967, **45**, 372-&.
6. W. Hayduk and S. C. Cheng, *Chemical Engineering Science*, 1971, **26**, 635-&.
7. W. J. McManamey and J. M. Woollen, *Aiche Journal*, 1973, **19**, 667-669.
8. D. Morgan, L. Ferguson and P. Scovazzo, *Industrial & Engineering Chemistry Research*, 2005, **44**, 4815-4823.
9. Y. Hou and R. E. Baltus, *Industrial & Engineering Chemistry Research*, 2007, **46**, 8166-8175.
10. J. Jacquemin, M. F. C. Gomes, P. Husson and V. Majer, *Journal of Chemical Thermodynamics*, 2006, **38**, 490-502.
11. M. B. Shiflett and A. Yokozeki, *Industrial & Engineering Chemistry Research*, 2005, **44**, 4453-4464.
12. C. P. Fredlake, J. M. Crosthwaite, D. G. Hert, S. Aki and J. F. Brennecke, *Journal of Chemical and Engineering Data*, 2004, **49**, 954-964.
13. R. Condemarin and P. Scovazzo, *Chemical Engineering Journal*, 2009, **147**, 51-57.
14. L. Ferguson and P. Scovazzo, *Industrial & Engineering Chemistry Research*, 2007, **46**, 1369-1374.
15. A. H. Jalili, A. Mehdizadeh, M. Shokouhi, A. N. Ahmadi, M. Hosseini-Jenab and F. Fateminassab, *Journal of Chemical Thermodynamics*, 2010, **42**, 1298-1303.
16. B. Goodrich, M.S, Thesis in *Department of Chemical and Biomolecular Engineering*, University of Notre Dame, Notre Dame, IN, 2011.
17. B. E. Gurkan, J. C. de la Fuente, E. M. Mindrup, L. E. Ficke, B. F. Goodrich, E. A. Price, W. F. Schneider and J. F. Brennecke, *Journal of the American Chemical Society*, 2010, **132**, 2116-+.
18. B. Gurkan, B. F. Goodrich, E. M. Mindrup, L. E. Ficke, M. Massel, S. Seo, T. P. Senftle, H. Wu, M. F. Glaser, J. K. Shah, E. J. Maginn, J. F. Brennecke and W. F. Schneider, *Journal of Physical Chemistry Letters*, 2010, **1**, 3494-3499.
19. D. Kodama, M. Kanakubo, M. Kokubo, S. Hashimoto, H. Nanjo and M. Kato, *Fluid Phase Equilib.*, 2011, **302**, 103-108.
